# Supplementary material for: Haploinsufficiency Interactions between RALBP1 and p53 in ERBB2 and PyVT Models of Mouse Mammary Carcinogenesis
Source: MDPI journal article supplement (doi:10.3390/cancers13133329), 2021-07-02

Supplementary Materials

Haploinsufficiency Interactions between RALBP1 and p53 in ERBB2 and PyVT Models of Mouse Mammary Carcinogenesis

Sharda P. Singh , Jihyun Lee, Chhanda Bose, Hongzhi Li, Yate-Ching Yuan, Ashly Hindle, Sharad S. Singhal, Jonathan Kopel, Philip T. Palade, Catherine Jones, Rakhshanda L. Rahman and Sanjay Awasthi

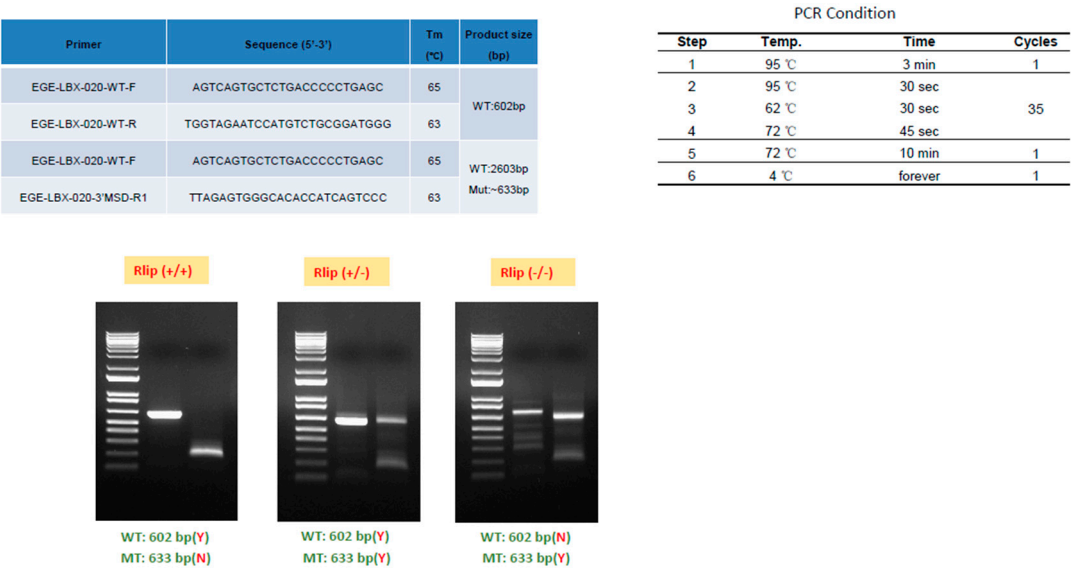

**Figure S1.** Genotyping details for *Ralpb1* wild-type and knockout genes as optimized by Biocytogen. Panels show the primer sequences, PCR thermal cycling protocol, and representative agarose gel images for each genotype.

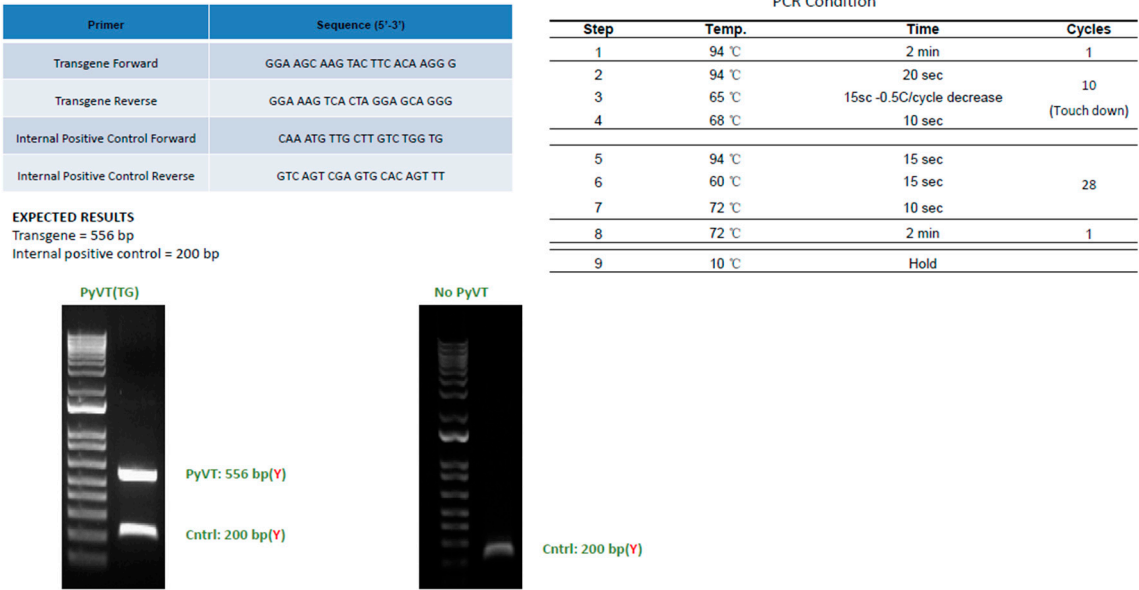

**Figure S2.** Genotyping details for the PyVT transgene as optimized by Jackson Laboratories. Panels show the primer sequences, PCR thermal cycling protocol, and representative agarose gel images for each genotype.

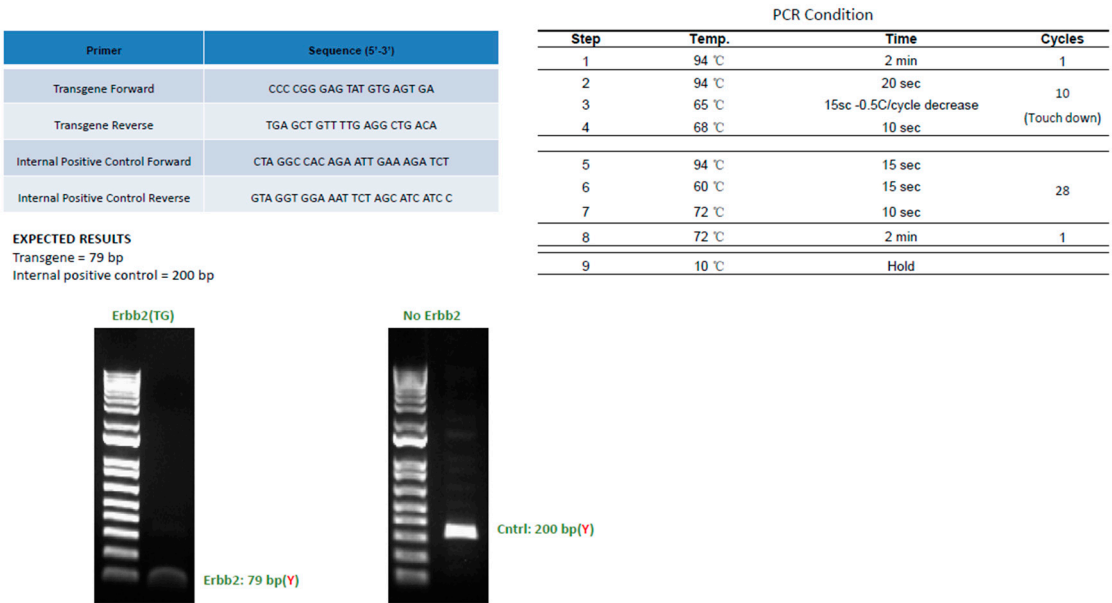

**Figure S3.** Genotyping details for the Erbb2 transgene as optimized by Jackson Laboratories. Panels show the primer sequences, PCR thermal cycling protocol, and representative agarose gel images for each genotype.

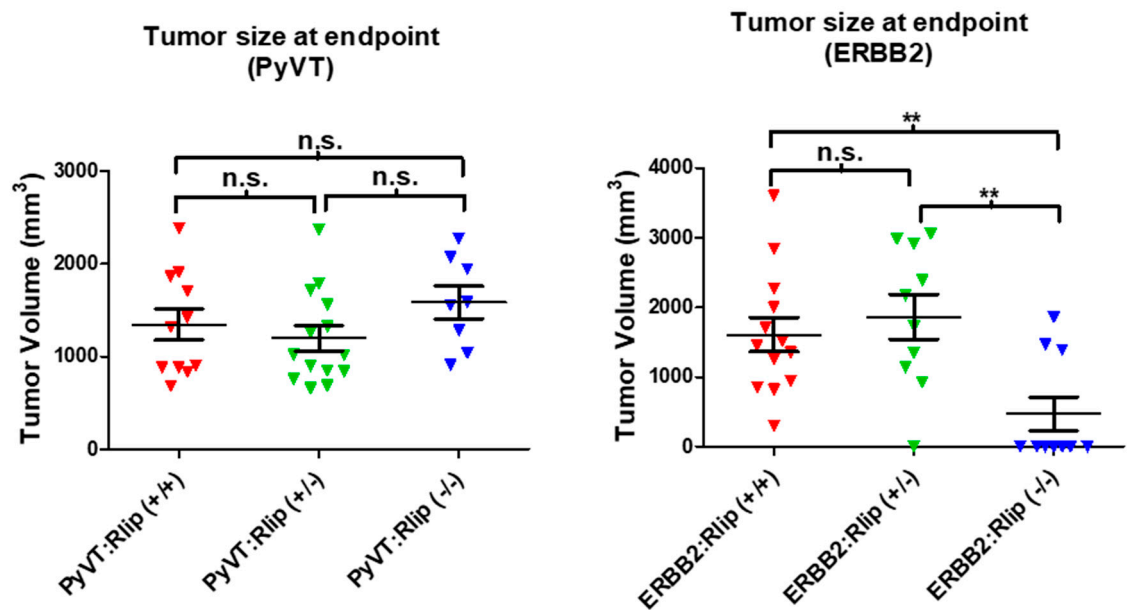

**Figure S4.** Tumor sizes at endpoint for PyVT and ERBB2 mice with wild-type, heterozygous knockout, or homozygous knockout Rlip genotypes. Note that 7 of 10 ERBB2:Rlip(-/-) mice were tumor-free at endpoint and were euthanized due to morbidities unrelated to tumor growth. The two asterisks (\*\*) indicate  $p < 0.01$ , and n.s. indicates not significant.

E-Cadherin (4A2) Mouse mAb (Cell signaling, #14472)

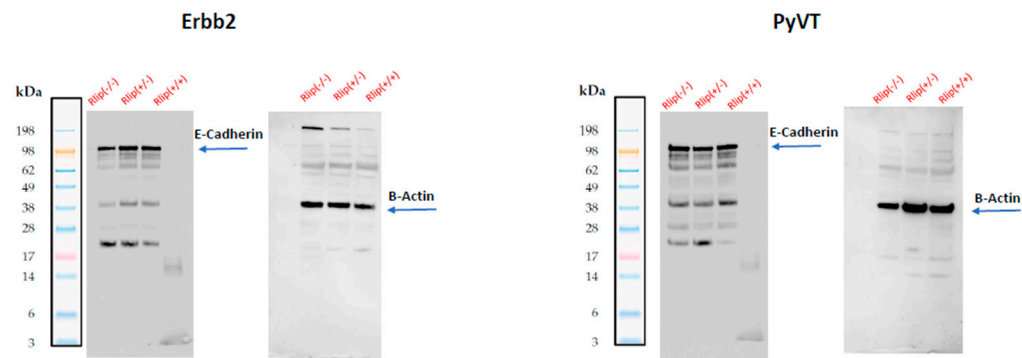

**Figure S5.** Western blots showing E-Cadherin expression in Erbb2:Rlip<sup>-/-</sup>, Erbb2:Rlip<sup>+/-</sup>, and Erbb2:Rlip<sup>+/+</sup> mice (left panels) and in PyVT:Rlip<sup>-/-</sup>, PyVT:Rlip<sup>+/-</sup>, and PyVT:Rlip<sup>+/+</sup> mice (right panels).

IkB $\alpha$  Antibody (Cell signaling, #9242)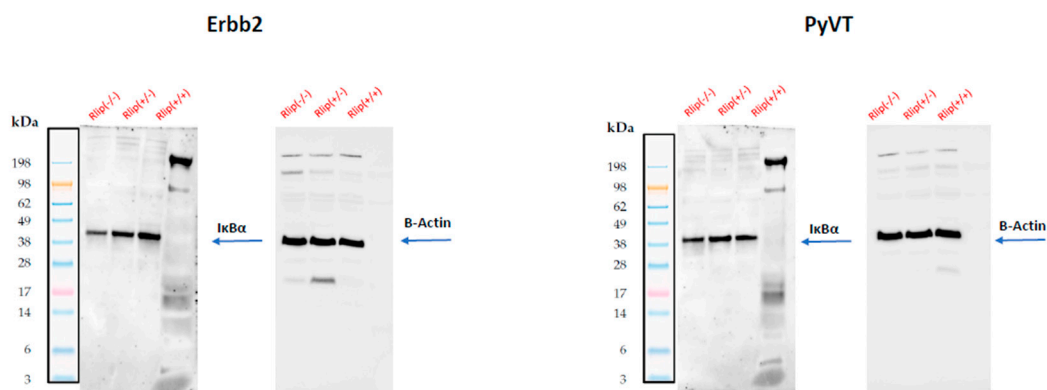

**Figure S6.** Western blots showing IkB $\alpha$  expression in Erb2:Rlip<sup>-/-</sup>, Erb2:Rlip<sup>+/-</sup>, and Erb2:Rlip<sup>+/+</sup> mice (left panels) and in PyVT:Rlip<sup>-/-</sup>, PyVT:Rlip<sup>+/-</sup>, and PyVT:Rlip<sup>+/+</sup> mice (right panels).

Vimentin [D21H3] XP<sup>®</sup> Rabbit mAb (Cell signaling, #5741)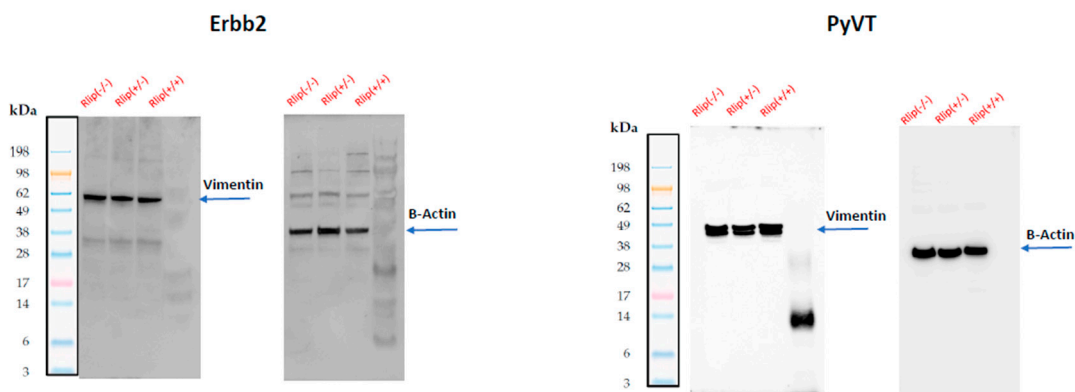

**Figure S7.** Western blots showing Vimentin expression in Erb2:Rlip<sup>-/-</sup>, Erb2:Rlip<sup>+/-</sup>, and Erb2:Rlip<sup>+/+</sup> mice (left panels) and in PyVT:Rlip<sup>-/-</sup>, PyVT:Rlip<sup>+/-</sup>, and PyVT:Rlip<sup>+/+</sup> mice (right panels).

Stat2 [D9J7L] Rabbit mAb(Cell signaling, #72604)

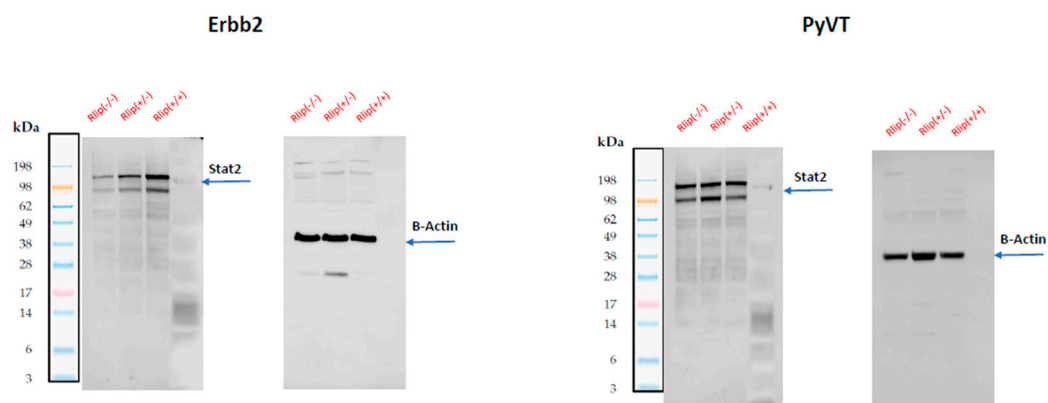

**Figure S8.** Western blots showing Stat2 expression in ErbB2:Rlip<sup>-/-</sup>, ErbB2:Rlip<sup>+/-</sup>, and ErbB2:Rlip<sup>+/+</sup> mice (left panels) and in PyVT:Rlip<sup>-/-</sup>, PyVT:Rlip<sup>+/-</sup>, and PyVT:Rlip<sup>+/+</sup> mice (right panels).

p42 MAP Kinase (Erk2) Antibody (Cell signaling, #9108)

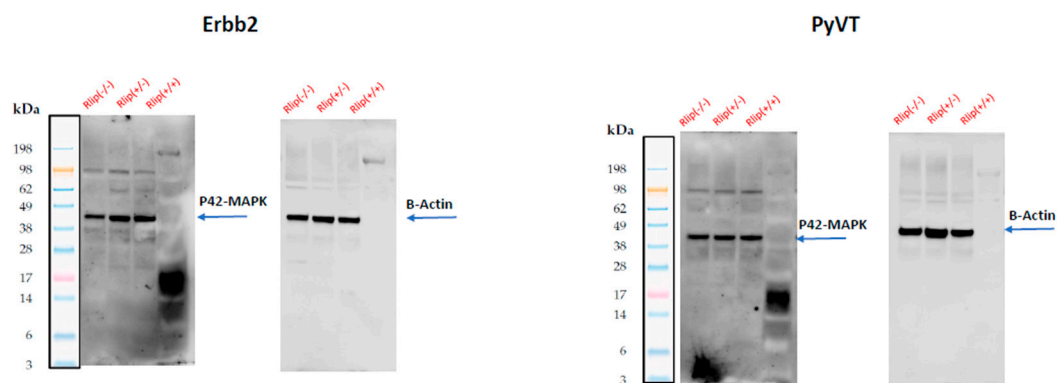

**Figure S9.** Western blots showing p42 MAP Kinase (Erk2) expression in ErbB2:Rlip<sup>-/-</sup>, ErbB2:Rlip<sup>+/-</sup>, and ErbB2:Rlip<sup>+/+</sup> mice (left panels) and in PyVT:Rlip<sup>-/-</sup>, PyVT:Rlip<sup>+/-</sup>, and PyVT:Rlip<sup>+/+</sup> mice (right panels).

## p70 S6 Kinase Antibody (Cell signaling, #9202)

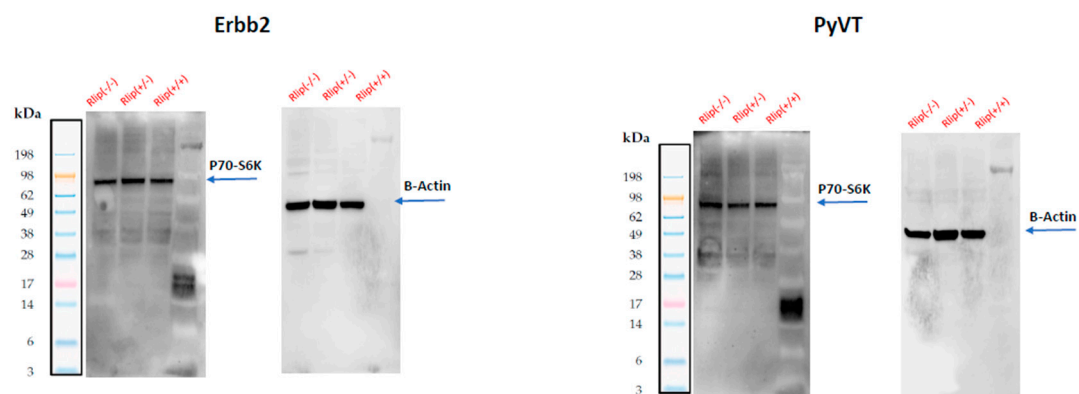

**Figure S10.** Western blots showing p70 S6 Kinase expression in ErbB2:*Rlip*<sup>-/-</sup>, ErbB2:*Rlip*<sup>+/-</sup>, and ErbB2:*Rlip*<sup>+/+</sup> mice (left panels) and in PyVT:*Rlip*<sup>-/-</sup>, PyVT:*Rlip*<sup>+/-</sup>, and PyVT:*Rlip*<sup>+/+</sup> mice (right panels).

## CDK4 Polyclonal Antibody (Invitrogen, PA5-27827)

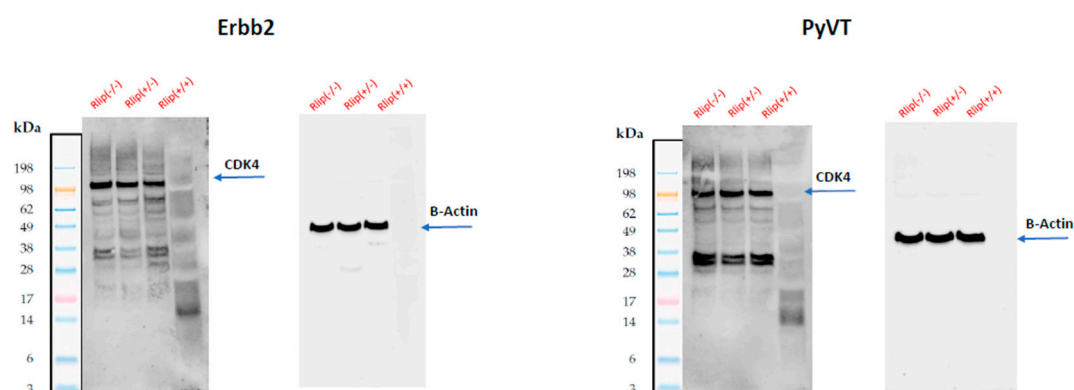

**Figure S11.** Western blots showing CDK4 expression in ErbB2:*Rlip*<sup>-/-</sup>, ErbB2:*Rlip*<sup>+/-</sup>, and ErbB2:*Rlip*<sup>+/+</sup> mice (left panels) and in PyVT:*Rlip*<sup>-/-</sup>, PyVT:*Rlip*<sup>+/-</sup>, and PyVT:*Rlip*<sup>+/+</sup> mice (right panels).

Bcl-2 Polyclonal Antibody (Invitrogen, PA5-20068)

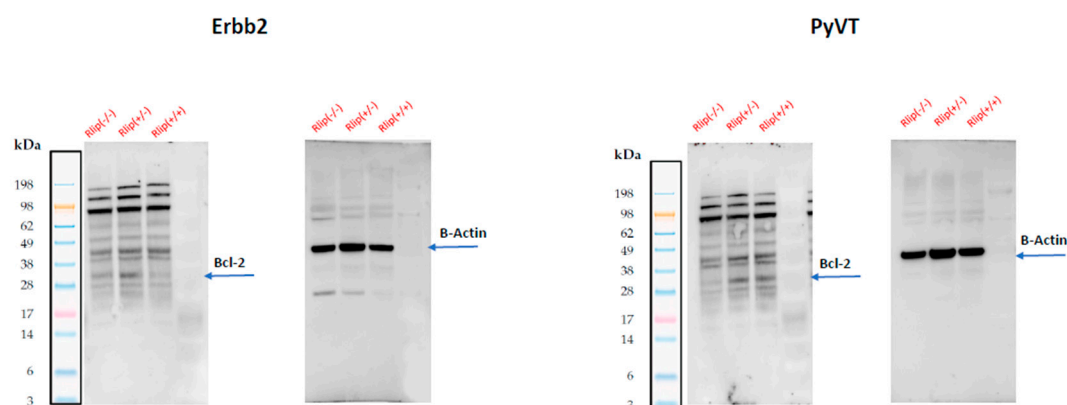

**Figure S12.** Western blots showing Bcl-2 expression in ErbB2:Rlip<sup>-/-</sup>, ErbB2:Rlip<sup>+/-</sup>, and ErbB2:Rlip<sup>+/+</sup> mice (left panels) and in PyVT:Rlip<sup>-/-</sup>, PyVT:Rlip<sup>+/-</sup>, and PyVT:Rlip<sup>+/+</sup> mice (right panels).

Cyclin B1 Polyclonal Antibody (Invitrogen, PA5-35245)

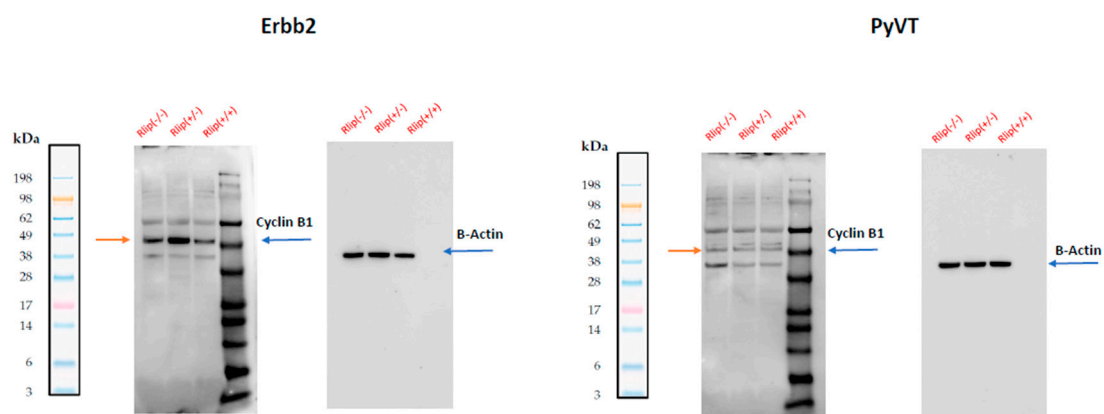

**Figure S13.** Western blots showing Cyclin B1 expression in ErbB2:Rlip<sup>-/-</sup>, ErbB2:Rlip<sup>+/-</sup>, and ErbB2:Rlip<sup>+/+</sup> mice (left panels) and in PyVT:Rlip<sup>-/-</sup>, PyVT:Rlip<sup>+/-</sup>, and PyVT:Rlip<sup>+/+</sup> mice (right panels).

PARP1 (cleaved Asp214, Asp215) Polyclonal Antibody (Invitrogen, 44-698G)

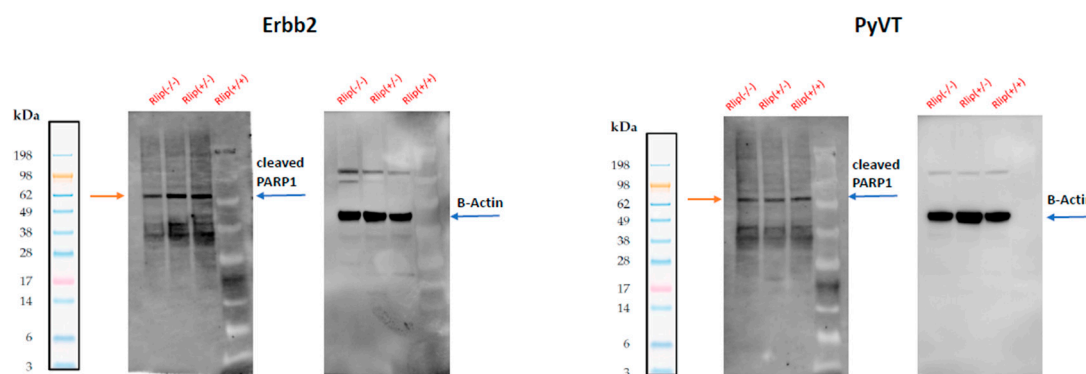

**Figure S14.** Western blots showing cleaved PARP1 expression in ErbB2:*Rlip*<sup>-/-</sup>, ErbB2:*Rlip*<sup>+/-</sup>, and ErbB2:*Rlip*<sup>+/+</sup> mice (left panels) and in PyVT:*Rlip*<sup>-/-</sup>, PyVT:*Rlip*<sup>+/-</sup>, and PyVT:*Rlip*<sup>+/+</sup> mice (right panels). The indicated band is the 62 kDa fragment.

Bax Polyclonal Antibody (Invitrogen, PA5-11378)

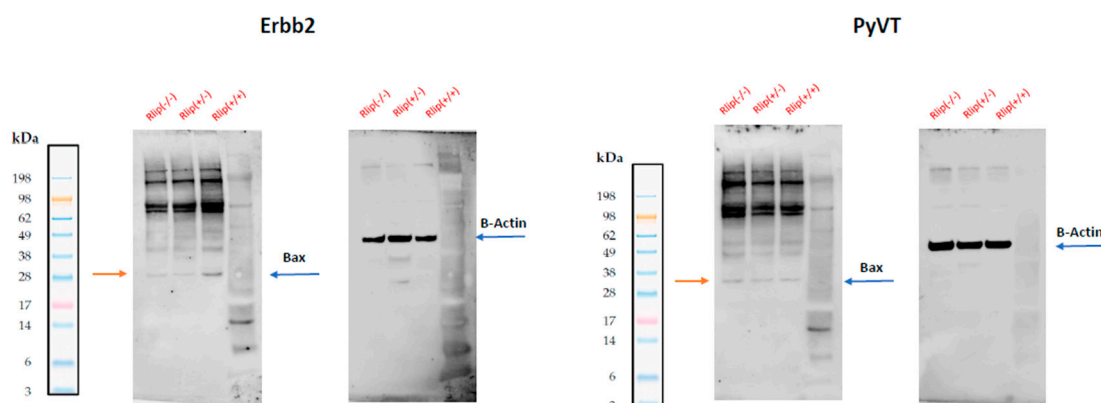

**Figure S15.** Western blots showing Bax expression in ErbB2:*Rlip*<sup>-/-</sup>, ErbB2:*Rlip*<sup>+/-</sup>, and ErbB2:*Rlip*<sup>+/+</sup> mice (left panels) and in PyVT:*Rlip*<sup>-/-</sup>, PyVT:*Rlip*<sup>+/-</sup>, and PyVT:*Rlip*<sup>+/+</sup> mice (right panels).



## Survivin (71G4B7) Rabbit mAb #2808

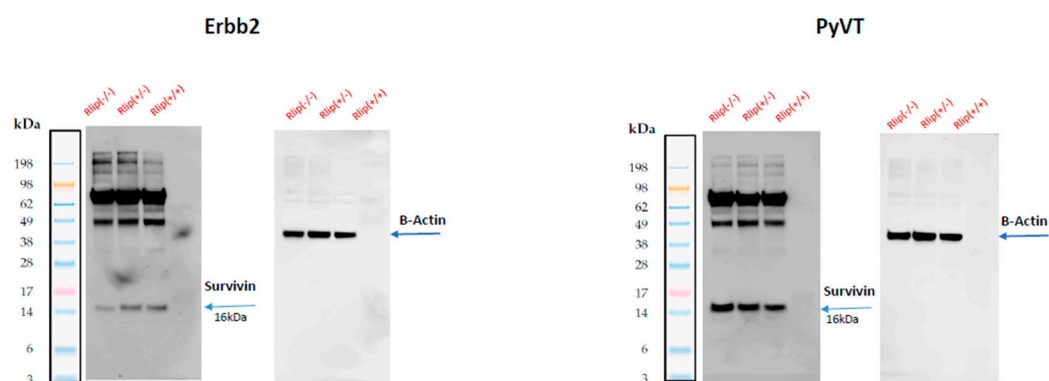

**Figure S16.** Western blots showing Survivin expression in ErbB2:*Rlip*<sup>-/-</sup>, ErbB2:*Rlip*<sup>+/-</sup>, and ErbB2:*Rlip*<sup>+/+</sup> mice (left panels) and in PyVT:*Rlip*<sup>-/-</sup>, PyVT:*Rlip*<sup>+/-</sup>, and PyVT:*Rlip*<sup>+/+</sup> mice (right panels).

## PI3 Kinase Class III Antibody #3811

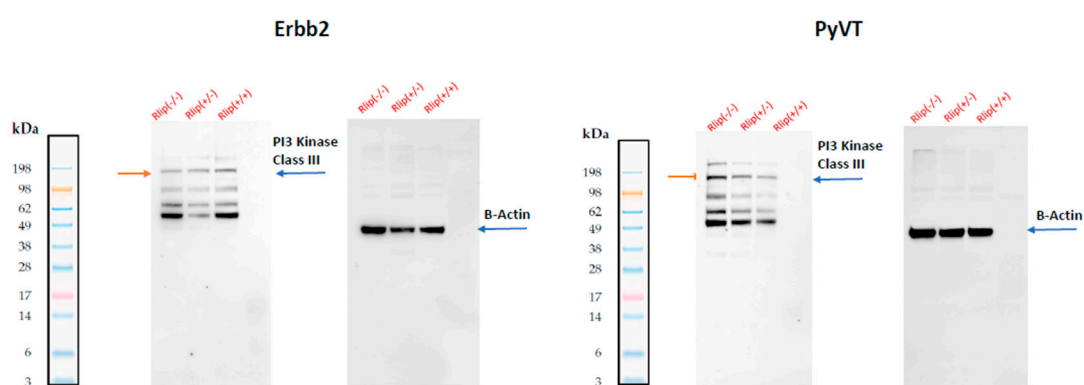

**Figure S17.** Western blots showing PI3 Kinase Class III expression in ErbB2:*Rlip*<sup>-/-</sup>, ErbB2:*Rlip*<sup>+/-</sup>, and ErbB2:*Rlip*<sup>+/+</sup> mice (left panels) and in PyVT:*Rlip*<sup>-/-</sup>, PyVT:*Rlip*<sup>+/-</sup>, and PyVT:*Rlip*<sup>+/+</sup> mice (right panels).

**Table S1.** Statistical analyses comparing survival of Erbb2:Rlip<sup>-/-</sup>, Erbb2:Rlip<sup>+/-</sup>, and Erbb2:Rlip<sup>+/+</sup> mice. Output is from GraphPad Prism 9.0 for Windows. Median survival is in days. \*\* indicates  $p < 0.01$ ; \*\*\* indicates  $p < 0.001$ .

| Comparison of Survival Curves Erbb2 Mice |               |                |                 |
|------------------------------------------|---------------|----------------|-----------------|
| Log-rank (Mantel-Cox) test (recommended) |               |                |                 |
| Chi square                               |               |                | 17.04           |
| df                                       |               |                | 2               |
| p value                                  |               |                | 0.0002          |
| p value summary                          |               |                | ***             |
| Are the survival curves sig different?   |               |                | Yes             |
| Logrank test for trend (recommended)     |               |                |                 |
| Chi square                               |               |                | 6.664           |
| df                                       |               |                | 1               |
| p value                                  |               |                | 0.0098          |
| p value summary                          |               |                | **              |
| Sig. trend?                              |               |                | Yes             |
| Gehan-Breslow-Wilcoxon test              |               |                |                 |
| Chi square                               |               |                | 13.43           |
| df                                       |               |                | 2               |
| p value                                  |               |                | 0.0012          |
| p value summary                          |               |                | **              |
| Are the survival curves sig different?   |               |                | Yes             |
|                                          | Rlip-WT/Erbb2 | Rlip-Het/Erbb2 | Rlip-Null/Erbb2 |
| Number of rows                           | 36            | 36             | 36              |
| # of blank lines                         | 23            | 26             | 25              |
| # rows with impossible data              | 0             | 0              | 0               |
| # censored subjects                      | 0             | 0              | 0               |
| # deaths/events                          | 13            | 10             | 11              |
| Median survival (Days)                   | 236           | 461.5          | 326             |

**Table S2.** Statistical analyses comparing survival of PyVT:Rlip<sup>-/-</sup>, PyVT:Rlip<sup>+/-</sup>, and PyVT:Rlip<sup>+/+</sup> mice. Output is from GraphPad Prism 9.0 for Windows. Median survival is in days. ns ( $p > 0.1$ ) indicates not significant.

| Comparison of Survival Curves of PyVT Mice |              |               |                |
|--------------------------------------------|--------------|---------------|----------------|
| Log-rank (Mantel-Cox) test (recommended)   |              |               |                |
| Chi square                                 |              |               | 3.790          |
| df                                         |              |               | 2              |
| p value                                    |              |               | 0.1503         |
| p value summary                            |              |               | ns             |
| Are the survival curves sig different?     |              |               | No             |
| Logrank test for trend (recommended)       |              |               |                |
| Chi square                                 |              |               | 0.8180         |
| df                                         |              |               | 1              |
| p value                                    |              |               | 0.3658         |
| p value summary                            |              |               | ns             |
| Sig. trend?                                |              |               | No             |
| Gehan-Breslow-Wilcoxon test                |              |               |                |
| Chi square                                 |              |               | 2.818          |
| df                                         |              |               | 2              |
| p value                                    |              |               | 0.2444         |
| p value summary                            |              |               | ns             |
| Are the survival curves sig different?     |              |               | No             |
|                                            | Rlip-WT/PyVT | Rlip-Het/PyVT | Rlip-Null/PyVT |

|                             |     |     |       |
|-----------------------------|-----|-----|-------|
| Number of rows              | 40  | 40  | 40    |
| # of blank lines            | 26  | 28  | 29    |
| # rows with impossible data | 0   | 0   | 1     |
| # censored subjects         | 0   | 0   | 0     |
| # deaths/events             | 14  | 12  | 10    |
| Median survival (Days)      | 133 | 127 | 133.5 |

|          |     |                                                       |     |
|----------|-----|-------------------------------------------------------|-----|
| LT_SV40  | 1   | MDKVLNREESLQMDLLGLERSAWGNIPLMRKAYLKCKKEFHPDKGGDEE     | 50  |
| MT_POVBG | 1   | MDRVLSRADKERLLELLKLPQLWGDGFRMQQAYKQQSLLLHPDKGGSHA     | 50  |
| LT_SV40  | 51  | KMKKMNLTLYKKMEDGVKYAHQPDFGGF-----WDATEIPTYGTD         | 89  |
| MT_POVBG | 51  | LMQELNSLWGTFTKTEV--YNLRMNLGGTGFGVRRRLHADGWNLSTKDTFG-- | 97  |
| LT_SV40  | 90  | EWEQWWNAFNEENLFCSEEMPSSDDE---ATADSQHSTPPKKRKRVEDPK    | 136 |
| MT_POVBG | 98  | --DRYYQRFCRMLPTCLVNVKYSSCSCILCLLRKQH-----RELKDKC      | 138 |
| LT_SV40  | 137 | DFPSELLSFLSHAVFSNRTLACFAI-----YTTKEKAAL-LYKKIMEKY     | 179 |
| MT_POVBG | 139 | DARCLVLG-----ECFCLECYMQWFGTPTRDVLNLYADFIASM           | 176 |
| LT_SV40  | 180 | SVTFISR--HNSYNHNILFFLTPHRHRVSAINNYAQKLCTFSFLICKG--    | 225 |
| MT_POVBG | 177 | PIDWLDLDVHSVYN-----PKRR-----SEELRRAATVHYTMTGHS        | 213 |
| LT_SV40  | 226 | -----VNKEYLMYSALTRDPFVSIEESLPGGLKE                    | 254 |
| MT_POVBG | 214 | AMEASTSQNGMISSESGETPATSRRLRLPSLLSNPTYSV-----MRS       | 255 |
| LT_SV40  | 255 | HDFNPEEAEETKQVSWKLVTEYAMETKCDDVLLLLG-----MY           | 292 |
| MT_POVBG | 256 | HSYPPTRV--LQIIPHILLEE-----DEILVLLSPMTAYPRTPELly       | 297 |
| LT_SV40  | 293 | LEFQYSFEMCLKCIKKEQPSHYKYHEKHANAIFADSKNQKTICQQAVD      | 342 |
| MT_POVBG | 298 | PE---SDQDQLEPLEEEE-----EEYMPMEDLYLDILPEEQVQLIPP       | 337 |
| LT_SV40  | 343 | TVLAKKRVDLSQ-LTREQMLTNRFNDLLDRMDIMFGSTGSA-----        | 382 |
| MT_POVBG | 338 | PIIPRAGLSPWEGLILRDLQRAHFDPILDASQRMRAHRAALRAHSMQRH     | 387 |
| LT_SV40  | 383 | --DIEEWMAGVAWLHCLLPKMDSVVYDFLKCMVYNIPKKRYWLFKGPIDS    | 430 |
| MT_POVBG | 388 | LRRLGRTLILLVTFLAALLG-----ICLMLFILIKRSRHF-----         | 421 |
| LT_SV40  | 431 | GKTTLAAALLELCGGKALNVNLPDLRLNFELGVAIDQFLVVFEDVKGTTG    | 480 |
| MT_POVBG | 422 | -----                                                 | 421 |

**Supplemental Data S1.** PyVT and LT\_SV40 share sequence similarity. From EMBOSS Needle #  
Length: 778; # Identity: 89/778 (11.4%); # Similarity: 177/778 (22.8%); # Gaps: 427/778 (54.9%); #Score:  
126.0.

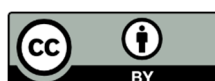

Supplement: s1 [file s1]
